# Supplementary material for: Preparation and Characterization of Hydrophobin 4-Coated Liposomes for Doxorubicin Delivery to Cancer Cells
Source: MDPI journal article supplement (doi:10.3390/ph17111422), 2024-10-24
Supplement: s1 [file pharmaceuticals-3252682-supplementary.pdf › pharmaceuticals-3252682-supplementary.pdf]

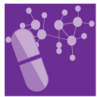

A

```
CLUSTAL O(1.2.4) multiple sequence alignment

HFB4      GPCSSGVTTNNVPKCCGTGVLDDLKLTPTQATSVLNPLSAVCGRVGLQAKCCTAGIGS 60
HFB1      NVCPPGLF-SNPQCCATQVLGLIGLCKVPSQNVYDGTDFRNVCAKTGAQPLCCVAPVAG 59
HFB2      AVCPTGLF-SNPLCCATNVLDLIGVDCPTPTIAVDTGAIQAHCAKSGSKPLCCVAPVAD 59
          *  * : . * * * . * * : : * * * : . : * . * : * * . : ..

HFB4      LGVLC 65
HFB1      QALLC 64
HFB2      QALLC 64
          . : * *
```

B

Reference sequence (1): HFB4  
Identities normalised by aligned length.  
Colored by: identity

|                | cov    | pid    | 1                                                              |
|----------------|--------|--------|----------------------------------------------------------------|
| 1 HFB4         | 100.0% | 100.0% | GPCSSGVTTNNVPKCCGTGVLDDLKLTPTQATSVLNPLSAVCGRVGLQAKCCTAGIGS 65  |
| 2 HFB1         | 98.5%  | 36.9%  | NVCPPGLF-SNPQCCATQVLGLIGLCKVPSQNVYDGTDFRNVCAKTGAQPLCCVAPVAG 64 |
| 3 HFB2         | 98.5%  | 38.5%  | AVCPTGLF-SNPLCCATNVLDLIGVDCPTPTIAVDTGAIQAHCAKSGSKPLCCVAPVAD 64 |
| consensus/100% |        |        | ssCsslh.ssp.CCultvslhldCKsso.ss.shs.hpshCuphs.pshCCsaslus.ulLC |
| consensus/90%  |        |        | ssCsslh.ssp.CCultvslhldCKsso.ss.shs.hpshCuphs.pshCCsaslus.ulLC |
| consensus/80%  |        |        | ssCsslh.ssp.CCultvslhldCKsso.ss.shs.hpshCuphs.pshCCsaslus.ulLC |
| consensus/70%  |        |        | ssCsslh.ssp.CCultvslhldCKsso.ss.shs.hpshCuphs.pshCCsaslus.ulLC |

**Figure S1.** Multiple Sequence Alignment of HFB1, HFB2 and HFB4 with Clustal Omega. (A) Mview visualisation of MSA exhibiting conserved residues (B).

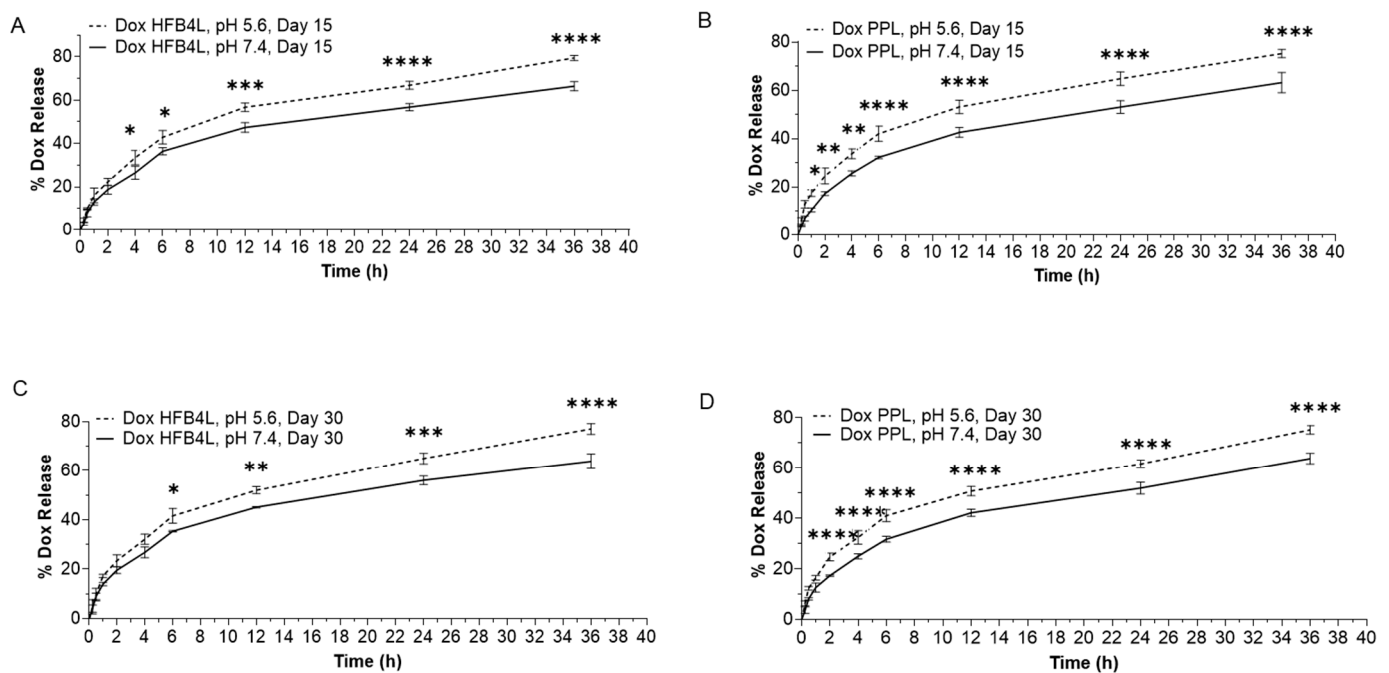

**Figure S2.** Release profiles of Dox-HFB4L Day 15 (A), Dox-PPL Day 15 (B), Dox-HFB4L Day 30 (C), Dox-PPL Day 30 for pH 5.6 and pH 7.4 at different time points. One-way ANOVA using Tukey's multiple comparison tests was conducted for each time point;  $p < 0.05$  was accepted as statistically significant. Each experiment was performed in triplicate. \* $p = 0.0103$ ; \*\* $p = 0.0035$ ; \*\*\* $p = 0.0007$ ; \*\*\*\* $p < 0.0001$ .

**Table S1.** The average particle size, particle size distribution (PDI), and zeta potential of Dox-HFB4L without lyophilization.

|                          | Day 0 at 4 °C      |             | Day 3 at 4 °C      |             |
|--------------------------|--------------------|-------------|--------------------|-------------|
|                          | Particle size (nm) | PDI         | Particle size (nm) | PDI         |
| Dox-HFB4L                | 213.90 ± 2.12      | 0.19 ± 0.06 | 341.23 ± 13.55     | 0.27 ± 0.03 |
| Dox-HFB4L (1 min vortex) | -                  | -           | 316.60 ± 19.54     | 0.26 ± 0.01 |
| Dox-HFB4L (2 min vortex) | -                  | -           | 249.73 ± 5.06      | 0.24 ± 0.01 |
